# Supplementary material for: A CRISPRi/a screening platform to study cellular nutrient transport in diverse microenvironments
Source: PubMed Central journal article supplement (PMC11098743; doi:10.1038/s41556-024-01402-1), 2024-04-11

# Western blots Raw Data #1 (Extended Data Figure 1c)

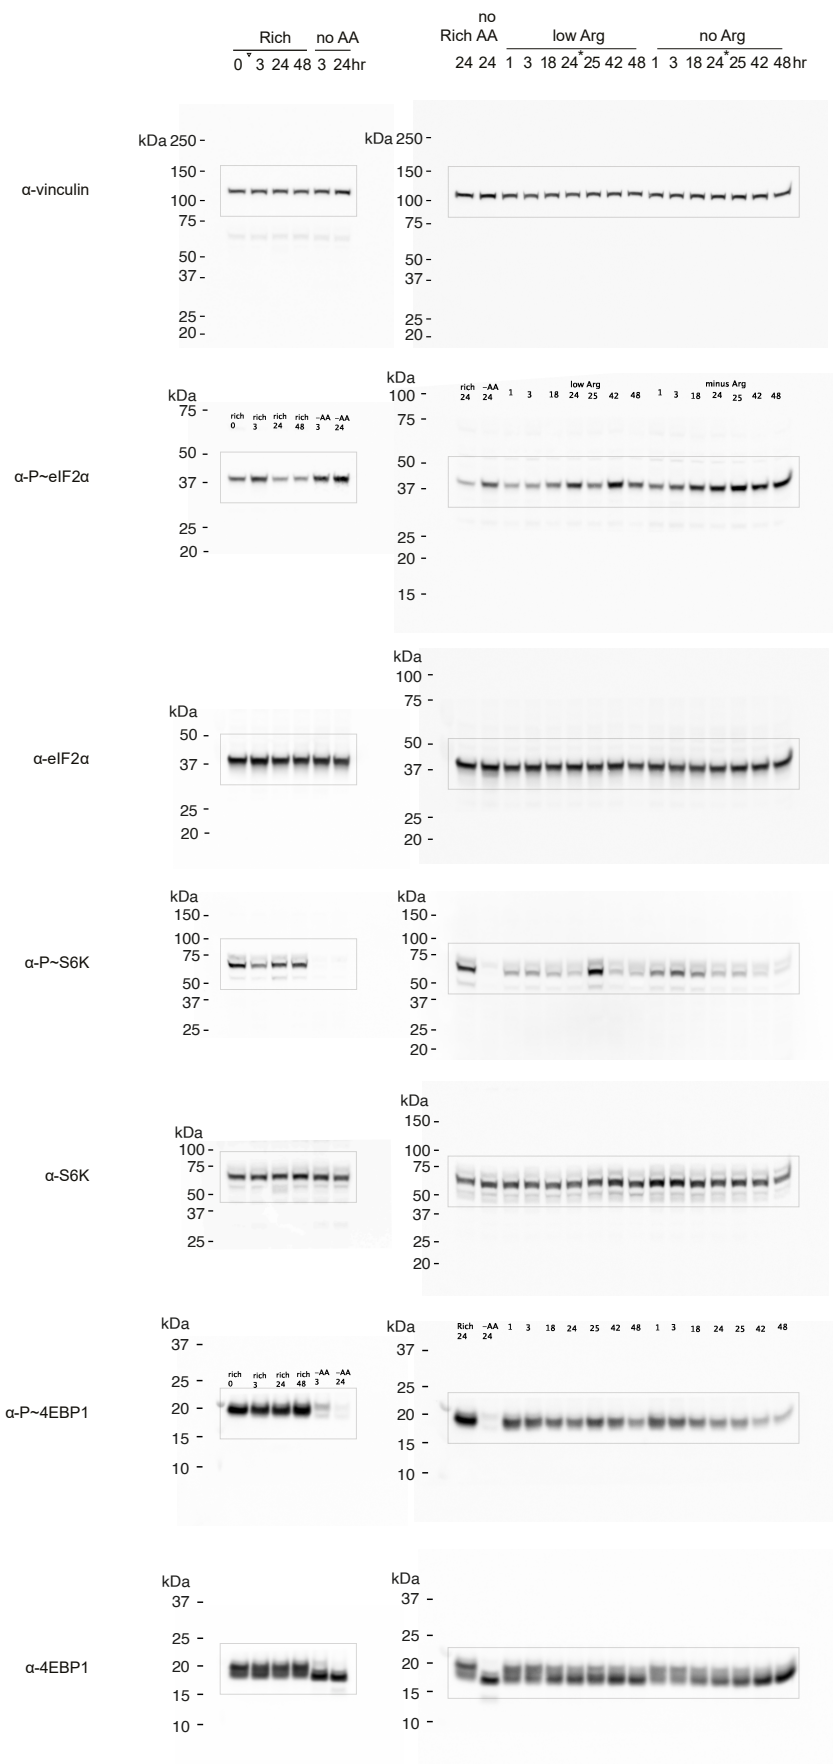

# Western blots Raw Data #2 (Extended Data Figure 1c)

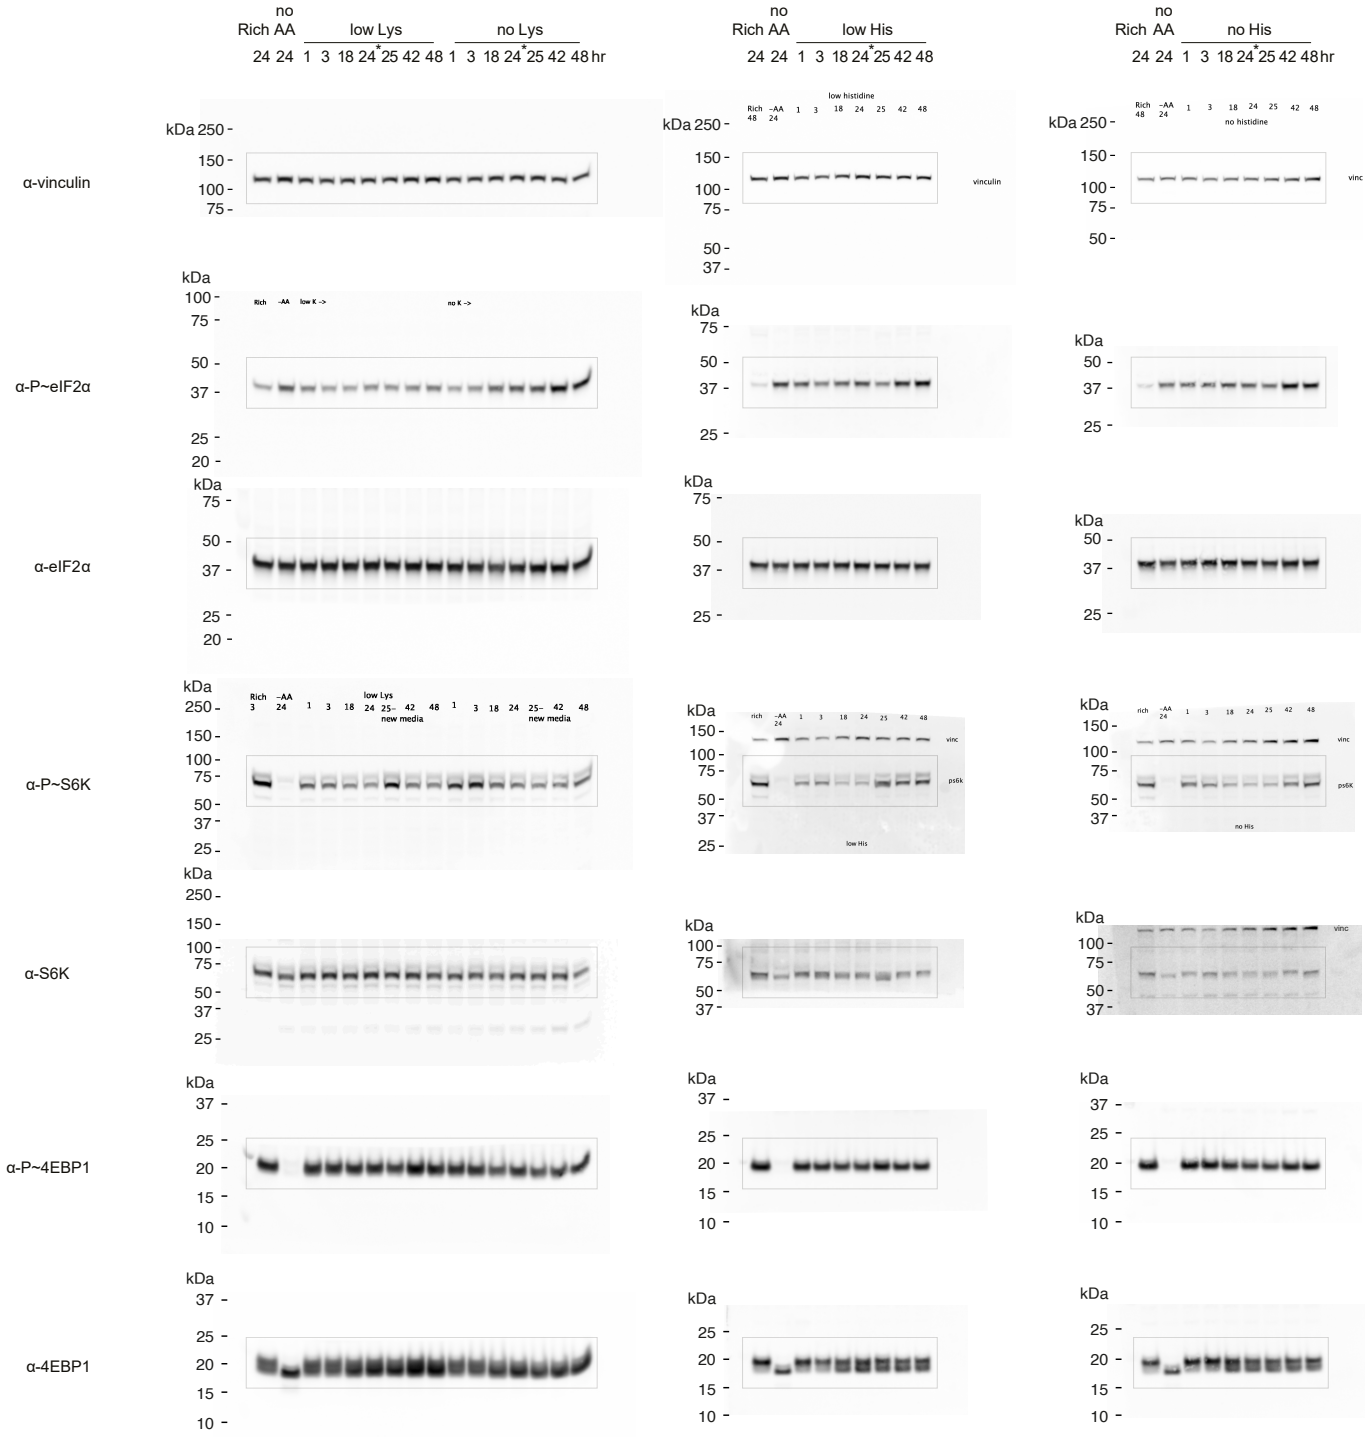



**Western blots Raw Data #4 (Extended Data Figure 8d)**

Another representative blot of the plasma membrane fractions:

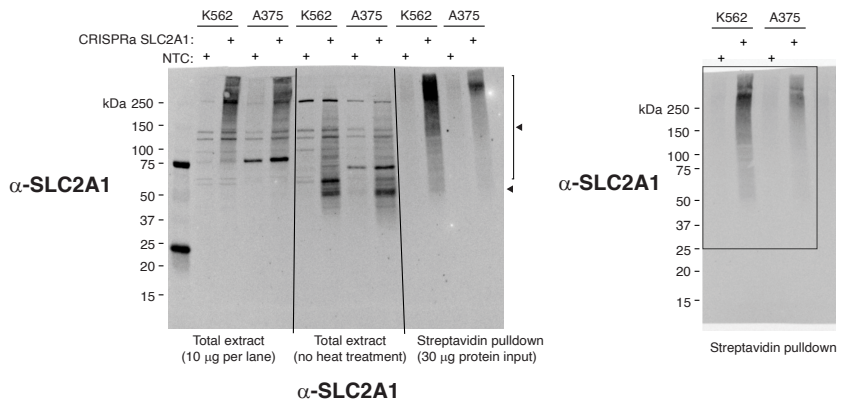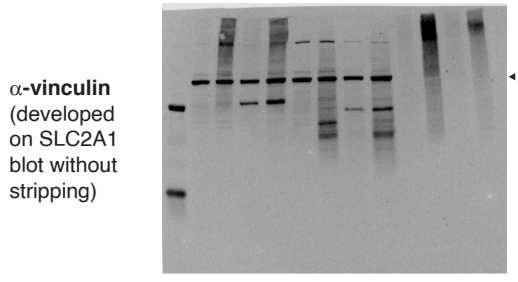

Supplement: 41556_2024_1402_MOESM23_ESM.pdf [file 41556_2024_1402_MOESM23_ESM.pdf]
